# Supplementary material
Source: PubMed Central journal article supplement (PMC7160852)
Supplement: NIHMS1573456-supplement-1.pdf [file NIHMS1573456-supplement-1.pdf]

**Neighborhood-level Measures of Socioeconomic Status are More Correlated with Individual-level Measures in Urban Areas  
Compared to Less Urban Areas**

Supplementary Materials

Table of Contents

Supplemental Table 1. Census data variables and factor score coefficients used to calculate the 2013 Area Deprivation Index (ADI)

Supplemental Table 2. Characteristics of respondents missing household income by county, SEPA-HHS 2010, 2012 and BLS-HHS 2011 (N = 4,764)

Supplemental Table 3. Characteristics of respondents missing address or geocode information by county, SEPA-HHS 2010, 2012 and BLS-HHS 2011 (N = 1,673)

Supplemental Table 4. Adjusted relative risk (RR) of fair/poor health associated with individual-level SES measures

Supplemental Table 5. Adjusted relative risk (RR) of obesity associated with individual-level SES measures

Supplemental Table 6. Relative risk (RR) of fair/poor health associated with obesity and the magnitude of confounding by individual-level SES.

Supplemental Table 7. Comparison of the agreement (Spearman's  $\rho$ ) between relative income and neighborhood advantage aggregated at the level of census tracts and Zip Code Tabulation Areas (ZCTAs)

Supplemental Fig. 1. Counties surveyed by SEPA-HHS and BLS-HHS shaded by urban/rural classification

Supplemental Fig. 2. County-level agreement (Spearman's  $\rho$ ) between educational attainment and tract-level neighborhood advantage

Supplemental Fig. 3. County-level agreement (Spearman's  $\rho$ ) between relative income and ZCTA-level neighborhood advantage

Supplemental Table 1. Census data variables and factor score coefficients used to calculate 2013 Area Deprivation Index (ADI)<sup>a</sup>

| Domain                       | Variable                                                                    | Coefficient |
|------------------------------|-----------------------------------------------------------------------------|-------------|
| Education                    | % Population aged 25 years or older with less than 9 years of education     | 0.0849      |
|                              | % Population aged 25 years or older with at least a high school diploma     | -0.0970     |
| Income/<br>employment        | Median family income in US dollars                                          | -0.0977     |
|                              | Income disparity <sup>b</sup>                                               | 0.0936      |
|                              | % Families below federal poverty level                                      | 0.0977      |
|                              | % Population below 150% of federal poverty level                            | 0.1037      |
|                              | % Civilian labor force population aged 16 years or older who are unemployed | 0.0806      |
|                              | % Employed population aged 16 years or older in white-collar occupations    | -0.0874     |
| Housing                      | Median home value in US dollars                                             | -0.0688     |
|                              | Median gross rent in US dollars                                             | -0.0781     |
|                              | Median monthly mortgage in US dollars                                       | -0.0770     |
|                              | % Owner-occupied housing units                                              | -0.0615     |
|                              | % Occupied housing units without complete plumbing (log)                    | 0.0510      |
| Household<br>characteristics | % Single-parent households with children younger than 18                    | 0.0719      |
|                              | % Households without a motor vehicle                                        | 0.0694      |
|                              | % Households without a telephone                                            | 0.0877      |
|                              | % Households with more than one person per room                             | 0.0556      |

<sup>a</sup>2013 ADI was calculated using data from the American Community Survey 5-year estimates from 2009-2013 by summing variables weighted by their respective factor score coefficients; <sup>b</sup>Income disparity defined as the log of 100\*ratio of households with <\$10,000 income to number of households with ≥\$50,000 income

Supplemental Table 2. Characteristics of respondents missing household income by county, SEPA-HHS 2010, 2012 and BLS-HHS 2011 (N = 4,764)

| Survey cycle(s)                  | SEPA-HHS 2010 & 2012        |                    |                      |                       |                         | BLS-HHS 2011       |                        |                         |
|----------------------------------|-----------------------------|--------------------|----------------------|-----------------------|-------------------------|--------------------|------------------------|-------------------------|
|                                  | Philadelphia<br>(n = 1,694) | Bucks<br>(n = 523) | Chester<br>(n = 605) | Delaware<br>(n = 621) | Montgomery<br>(n = 830) | Berks<br>(n = 175) | Lancaster<br>(n = 172) | Schuylkill<br>(n = 144) |
| County                           |                             |                    |                      |                       |                         |                    |                        |                         |
| Age, median (IQR), y             | 58 (48-71)                  | 58 (49-71)         | 57 (49-69)           | 58 (49-72)            | 58 (48-71)              | 61 (48-73)         | 60 (49-72)             | 62 (49-75)              |
| Female, No. (%)                  | 1,167 (68.9)                | 362 (69.2)         | 398 (65.8)           | 425 (68.4)            | 568 (68.4)              | 108 (61.7)         | 98 (57)                | 93 (64.6)               |
| Race <sup>a</sup> , No. (%)      |                             |                    |                      |                       |                         |                    |                        |                         |
| White                            | 701 (41.4)                  | 455 (87)           | 512 (84.6)           | 489 (78.7)            | 706 (85.1)              | 156 (89.1)         | 153 (89.0)             | 134 (93.1)              |
| Black                            | 637 (37.6)                  | 6 (1.1)            | 31 (5.1)             | 72 (11.6)             | 36 (4.3)                | 2 (1.1)            | 3 (1.7)                | 1 (0.7)                 |
| Hispanic                         | 148 (8.7)                   | 14 (2.7)           | 14 (2.3)             | 5 (0.8)               | 15 (1.8)                | 7 (4.0)            | 3 (1.7)                | 3 (2.1)                 |
| Other                            | 87 (5.1)                    | 16 (3.1)           | 18 (3.0)             | 17 (2.7)              | 26 (3.1)                | 2 (1.1)            | 2 (1.2)                | 1 (0.7)                 |
| Missing                          | 121 (7.1)                   | 32 (6.1)           | 30 (5.0)             | 38 (6.1)              | 47 (5.7)                | 8 (4.6)            | 11 (6.4)               | 5 (3.5)                 |
| Education <sup>b</sup> , No. (%) |                             |                    |                      |                       |                         |                    |                        |                         |
| College +                        | 375 (22.1)                  | 219 (41.9)         | 316 (52.2)           | 264 (42.5)            | 428 (51.6)              | 39 (22.3)          | 42 (24.4)              | 19 (13.2)               |
| Some college                     | 341 (20.1)                  | 110 (21.0)         | 109 (18.0)           | 127 (20.5)            | 154 (18.6)              | 35 (20.0)          | 30 (17.4)              | 31 (21.5)               |
| High school                      | 669 (39.5)                  | 153 (29.3)         | 140 (23.1)           | 193 (31.1)            | 195 (23.5)              | 73 (41.7)          | 75 (43.6)              | 75 (52.1)               |
| < High school                    | 270 (15.9)                  | 35 (6.7)           | 35 (5.8)             | 25 (4.0)              | 37 (4.5)                | 25 (14.3)          | 23 (13.4)              | 17 (11.8)               |

<sup>a</sup> *White* refers to Non-Hispanic white race/ethnicity and *black* refers to Non-Hispanic black race/ethnicity; <sup>b</sup> *Education* refers to respondent's educational attainment

Supplemental Table 3. Characteristics of respondents missing address or geocode information by county, SEPA-HHS 2010, 2012 and BLS-HHS 2011 (N = 1,673)

| Survey cycle(s)                           | SEPA-HHS 2010 & 2012      |                    |                      |                       |                         | BLS-HHS 2011      |                       |                        |
|-------------------------------------------|---------------------------|--------------------|----------------------|-----------------------|-------------------------|-------------------|-----------------------|------------------------|
|                                           | Philadelphia<br>(n = 633) | Bucks<br>(n = 158) | Chester<br>(n = 175) | Delaware<br>(n = 239) | Montgomery<br>(n = 213) | Berks<br>(n = 82) | Lancaster<br>(n = 82) | Schuylkill<br>(n = 91) |
| Age, median (IQR), y                      | 50 (40-59)                | 50 (42-61)         | 52 (45-62)           | 52 (41-60)            | 50 (41-59)              | 52 (42-62)        | 50 (41-61)            | 56 (48-67)             |
| Female, No. (%)                           | 442 (69.8)                | 84 (53.2)          | 102 (58.3)           | 152 (63.6)            | 134 (62.9)              | 43 (52.4)         | 39 (47.6)             | 37 (40.7)              |
| <i>Race</i> <sup>a</sup> , No. (%)        |                           |                    |                      |                       |                         |                   |                       |                        |
| White                                     | 218 (34.4)                | 133 (84.2)         | 139 (79.4)           | 160 (66.9)            | 168 (78.9)              | 65 (79.3)         | 69 (84.1)             | 86 (94.5)              |
| Black                                     | 316 (49.9)                | 11 (7.9)           | 16 (9.1)             | 58 (24.3)             | 23 (10.8)               | 2 (2.4)           | 2 (2.4)               | 0                      |
| Hispanic                                  | 54 (8.5)                  | 7 (4.4)            | 12 (6.9)             | 10 (4.2)              | 10 (4.7)                | 10 (12.2)         | 8 (9.8)               | 1 (1.1)                |
| Other                                     | 45 (7.1)                  | 7 (4.4)            | 8 (4.6)              | 11 (4.6)              | 12 (5.6)                | 5 (6.1)           | 3 (3.7)               | 4 (4.4)                |
| <i>Rel. income</i> <sup>b</sup> , No. (%) |                           |                    |                      |                       |                         |                   |                       |                        |
| High (>5)                                 | 117 (18.5)                | 64 (40.5)          | 83 (47.4)            | 89 (37.2)             | 92 (43.2)               | 17 (20.7)         | 20 (24.4)             | 12 (13.2)              |
| Middle (2-5)                              | 236 (37.3)                | 57 (36.1)          | 58 (33.1)            | 87 (36.4)             | 94 (44.1)               | 43 (52.4)         | 36 (43.9)             | 52 (57.1)              |
| Low (<2)                                  | 280 (44.2)                | 37 (23.4)          | 34 (19.4)            | 63 (26.4)             | 27 (12.7)               | 22 (26.8)         | 26 (31.7)             | 27 (29.7)              |
| <i>Education</i> <sup>c</sup> , No. (%)   |                           |                    |                      |                       |                         |                   |                       |                        |
| College +                                 | 194 (30.6)                | 63 (39.9)          | 100 (57.1)           | 105 (43.9)            | 117 (54.9)              | 27 (32.9)         | 27 (32.9)             | 10 (11.0)              |
| Some college                              | 137 (21.6)                | 41 (25.9)          | 27 (15.4)            | 54 (22.6)             | 49 (23.0)               | 10 (12.2)         | 17 (20.7)             | 18 (19.8)              |
| High school                               | 221 (34.9)                | 47 (29.7)          | 39 (22.3)            | 67 (28.0)             | 41 (19.2)               | 27 (32.9)         | 25 (30.5)             | 53 (58.2)              |
| < High school                             | 81 (12.8)                 | 7 (4.4)            | 9 (5.1)              | 13 (5.4)              | 6 (2.8)                 | 18 (22.0)         | 13 (15.9)             | 10 (11.0)              |

<sup>a</sup> *White* refers to Non-Hispanic white race/ethnicity and *black* refers to Non-Hispanic black race/ethnicity; <sup>b</sup>*Rel. income* (relative income) refers to the factor by which reported household income is above or below the federal poverty line determined for that household; <sup>c</sup>*Education* refers to respondent's educational attainment

Supplemental Table 4. Adjusted<sup>a</sup> relative risk (RR) of fair/poor health associated with individual-level SES measures. Significant results ( $p < 0.05$ ) are bolded.

| Individual-level SES indicator | Philadelphia<br>$\beta$ (95% CI) <sup>b</sup> | Bucks<br>$\beta$ (95% CI) | Chester<br>$\beta$ (95% CI) | Delaware<br>$\beta$ (95% CI) | Montgomery<br>$\beta$ (95% CI) | Berks<br>$\beta$ (95% CI) | Lancaster<br>$\beta$ (95% CI) | Schuylkill<br>$\beta$ (95% CI) |
|--------------------------------|-----------------------------------------------|---------------------------|-----------------------------|------------------------------|--------------------------------|---------------------------|-------------------------------|--------------------------------|
| <b>Relative income</b>         |                                               |                           |                             |                              |                                |                           |                               |                                |
| Q1 (lowest)                    | Reference                                     | Reference                 | Reference                   | Reference                    | Reference                      | Reference                 | Reference                     | Reference                      |
| Q2                             | <b>0.75 (0.67, 0.83)</b>                      | <b>0.42 (0.31, 0.58)</b>  | <b>0.48 (0.34, 0.67)</b>    | <b>0.51 (0.39, 0.67)</b>     | <b>0.67 (0.52, 0.86)</b>       | <b>0.54 (0.37, 0.78)</b>  | <b>0.48 (0.31, 0.76)</b>      | <b>0.49 (0.35, 0.69)</b>       |
| Q3                             | <b>0.50 (0.44, 0.58)</b>                      | <b>0.41 (0.29, 0.59)</b>  | <b>0.30 (0.19, 0.47)</b>    | <b>0.44 (0.32, 0.61)</b>     | <b>0.32 (0.22, 0.46)</b>       | <b>0.43 (0.28, 0.67)</b>  | <b>0.46 (0.28, 0.75)</b>      | <b>0.31 (0.20, 0.47)</b>       |
| Q4 (highest)                   | <b>0.35 (0.28, 0.43)</b>                      | <b>0.35 (0.23, 0.54)</b>  | <b>0.28 (0.16, 0.48)</b>    | <b>0.28 (0.18, 0.45)</b>     | <b>0.24 (0.15, 0.38)</b>       | <b>0.16 (0.07, 0.33)</b>  | <b>0.30 (0.15, 0.59)</b>      | <b>0.28 (0.17, 0.47)</b>       |
| <b>Education</b>               |                                               |                           |                             |                              |                                |                           |                               |                                |
| College +                      | Reference                                     | Reference                 | Reference                   | Reference                    | Reference                      | Reference                 | Reference                     | Reference                      |
| Some college                   | <b>1.37 (1.15, 1.64)</b>                      | <b>1.63 (1.16, 2.28)</b>  | 1.36 (0.95, 1.94)           | <b>2.03 (1.43, 2.89)</b>     | 1.24 (0.90, 1.69)              | 1.09 (0.61, 1.94)         | 1.59 (0.82, 3.1)              | 0.91 (0.53, 1.57)              |
| High school                    | <b>1.48 (1.25, 1.75)</b>                      | <b>1.65 (1.17, 2.32)</b>  | 1.34 (0.95, 1.87)           | <b>2.15 (1.52, 3.03)</b>     | <b>1.34 (1.01, 1.77)</b>       | 1.54 (0.96, 2.47)         | 1.73 (0.98, 3.06)             | 1.06 (0.66, 1.70)              |
| < High school                  | <b>2.07 (1.72, 2.49)</b>                      | 1.75 (0.99, 3.1)          | 1.40 (0.85, 2.32)           | <b>3.03 (1.96, 4.68)</b>     | <b>1.59 (1.04, 2.42)</b>       | <b>1.91 (1.14, 3.19)</b>  | 1.88 (0.95, 3.72)             | 1.42 (0.83, 2.43)              |

<sup>a</sup>All models adjusted for age, sex, race/ethnicity, neighborhood advantage, relative income, and education; <sup>b</sup>CI denotes confidence interval

Supplemental Table 5. Adjusted<sup>a</sup> relative risk (RR) of obesity associated with individual-level SES measures. Significant results ( $p < 0.05$ ) are bolded.

| Individual-level SES indicator | Philadelphia<br>$\beta$ (95% CI) <sup>b</sup> | Bucks<br>$\beta$ (95% CI) | Chester<br>$\beta$ (95% CI) | Delaware<br>$\beta$ (95% CI) | Montgomery<br>$\beta$ (95% CI) | Berks<br>$\beta$ (95% CI) | Lancaster<br>$\beta$ (95% CI) | Schuylkill<br>$\beta$ (95% CI) |
|--------------------------------|-----------------------------------------------|---------------------------|-----------------------------|------------------------------|--------------------------------|---------------------------|-------------------------------|--------------------------------|
| <b>Relative income</b>         |                                               |                           |                             |                              |                                |                           |                               |                                |
| Q1 (lowest)                    | Reference                                     | Reference                 | Reference                   | Reference                    | Reference                      | Reference                 | Reference                     | Reference                      |
| Q2                             | 1.00 (0.91, 1.09)                             | 0.77 (0.61, 0.98)         | 0.81 (0.65, 1.02)           | 0.95 (0.80, 1.14)            | <b>0.81 (0.67, 0.97)</b>       | <b>0.68 (0.50, 0.93)</b>  | 0.90 (0.67, 1.22)             | 0.93 (0.70, 1.24)              |
| Q3                             | 0.97 (0.87, 1.07)                             | 0.96 (0.76, 1.20)         | <b>0.73 (0.58, 0.93)</b>    | 0.83 (0.67, 1.02)            | <b>0.78 (0.64, 0.95)</b>       | 0.87 (0.65, 1.16)         | 0.82 (0.60, 1.13)             | 0.97 (0.73, 1.29)              |
| Q4 (highest)                   | <b>0.84 (0.74, 0.95)</b>                      | 0.89 (0.69, 1.14)         | 0.77 (0.58, 1.02)           | <b>0.78 (0.61, 0.98)</b>     | <b>0.72 (0.58, 0.90)</b>       | <b>0.63 (0.44, 0.91)</b>  | 0.84 (0.59, 1.20)             | 0.79 (0.57, 1.10)              |
| <b>Education</b>               |                                               |                           |                             |                              |                                |                           |                               |                                |
| College +                      | Reference                                     | Reference                 | Reference                   | Reference                    | Reference                      | Reference                 | Reference                     | Reference                      |
| Some college                   | <b>1.28 (1.15, 1.43)</b>                      | 1.18 (0.96, 1.46)         | 1.08 (0.86, 1.36)           | 1.15 (0.96, 1.39)            | 1.16 (0.96, 1.39)              | 1.09 (0.77, 1.55)         | 1.26 (0.87, 1.80)             | 0.88 (0.63, 1.23)              |
| High school                    | <b>1.16 (1.04, 1.29)</b>                      | 1.03 (0.83, 1.27)         | 1.06 (0.85, 1.33)           | <b>1.20 (1.00, 1.44)</b>     | <b>1.24 (1.04, 1.48)</b>       | 1.26 (0.94, 1.71)         | 1.26 (0.92, 1.74)             | 0.94 (0.70, 1.26)              |
| < High school                  | 1.12 (0.97, 1.30)                             | <b>1.93 (1.38, 2.70)</b>  | 1.02 (0.68, 1.55)           | 1.13 (0.79, 1.63)            | <b>1.44 (1.04, 1.99)</b>       | <b>1.68 (1.16, 2.43)</b>  | <b>1.56 (1.04, 2.35)</b>      | 0.74 (0.46, 1.21)              |

<sup>a</sup>All models adjusted for age, sex, race/ethnicity, neighborhood advantage, relative income, and education; <sup>b</sup>CI denotes confidence interval

Supplemental Table 6. Relative risk (RR) of fair/poor health associated with obesity and the magnitude of confounding by individual-level SES.

| County       | Urbanicity (NCHS class) | RR of fair/poor health associated with obesity               |                                   | Magnitude of confounding (%) <sup>c</sup> |
|--------------|-------------------------|--------------------------------------------------------------|-----------------------------------|-------------------------------------------|
|              |                         | Model 1 <sup>a</sup> , RR <sub>1</sub> (95% CI) <sup>b</sup> | Model 2, RR <sub>2</sub> (95% CI) |                                           |
| Philadelphia | Urban (1)               | 1.60 (1.45, 1.76)                                            | 1.55 (1.41, 1.70)                 | 3.2                                       |
| Bucks        | Suburban (2)            | 2.07 (1.64, 2.62)                                            | 1.96 (1.55, 2.48)                 | 5.6                                       |
| Chester      | Suburban (2)            | 2.40 (1.85, 3.10)                                            | 2.19 (1.7, 2.83)                  | 9.6                                       |
| Delaware     | Suburban (2)            | 1.74 (1.40, 2.16)                                            | 1.60 (1.30, 1.97)                 | 8.8                                       |
| Montgomery   | Suburban (2)            | 1.95 (1.57, 2.44)                                            | 1.73 (1.39, 2.15)                 | 12.7                                      |
| Berks        | Medium metro (3)        | 2.05 (1.52, 2.76)                                            | 1.68 (1.25, 2.25)                 | 22.0                                      |
| Lancaster    | Medium metro (3)        | 1.85 (1.32, 2.61)                                            | 1.61 (1.14, 2.27)                 | 14.9                                      |

<sup>a</sup>Model 1 was a Poisson regression model with robust variance estimates with covariate adjustments for respondent sex, age, race/ethnicity, and neighborhood advantage categorized into quartiles. Model 2 included all covariates included in Model 1 with additional adjustment for relative income quartiles and respondent education. <sup>b</sup>CI indicates confidence interval. <sup>c</sup>Magnitude of confounding by individual-level SES when only neighborhood-level measures were accounted for, estimated as a percentage:  $100 * (RR_1 - RR_2) / RR_2$ , where  $RR_1$  and  $RR_2$  were estimated from models 1 and 2, respectively.

Supplemental Table 7. Comparison of the agreement (Spearman's  $\rho$ ) between relative income and census tract-level vs. ZIP Code Tabulation Area (ZCTA)-level neighborhood advantage<sup>a</sup>

| County       | Census tracts | ZCTAs |
|--------------|---------------|-------|
| Philadelphia | 0.472         | 0.414 |
| Bucks        | 0.332         | 0.313 |
| Chester      | 0.390         | 0.303 |
| Delaware     | 0.447         | 0.453 |
| Montgomery   | 0.356         | 0.277 |
| Berks        | 0.308         | 0.266 |
| Lancaster    | 0.156         | 0.058 |
| Schuylkill   | 0.255         | 0.232 |

<sup>a</sup>ZCTA-level neighborhood advantage was calculated as follows: (1) variables listed in Supplemental Table 1 were extracted at the ZCTA level from the American Community Survey 5-year estimates for 2009-2013; (2) ZCTA-level ADI were derived as the linear combination of variables using factor coefficients given in Supplemental Table 1 and transformed to a percentile ranking (taking values 0-99); (3) ZCTA-level neighborhood advantage was calculated by subtracting the ADI percentile from 100



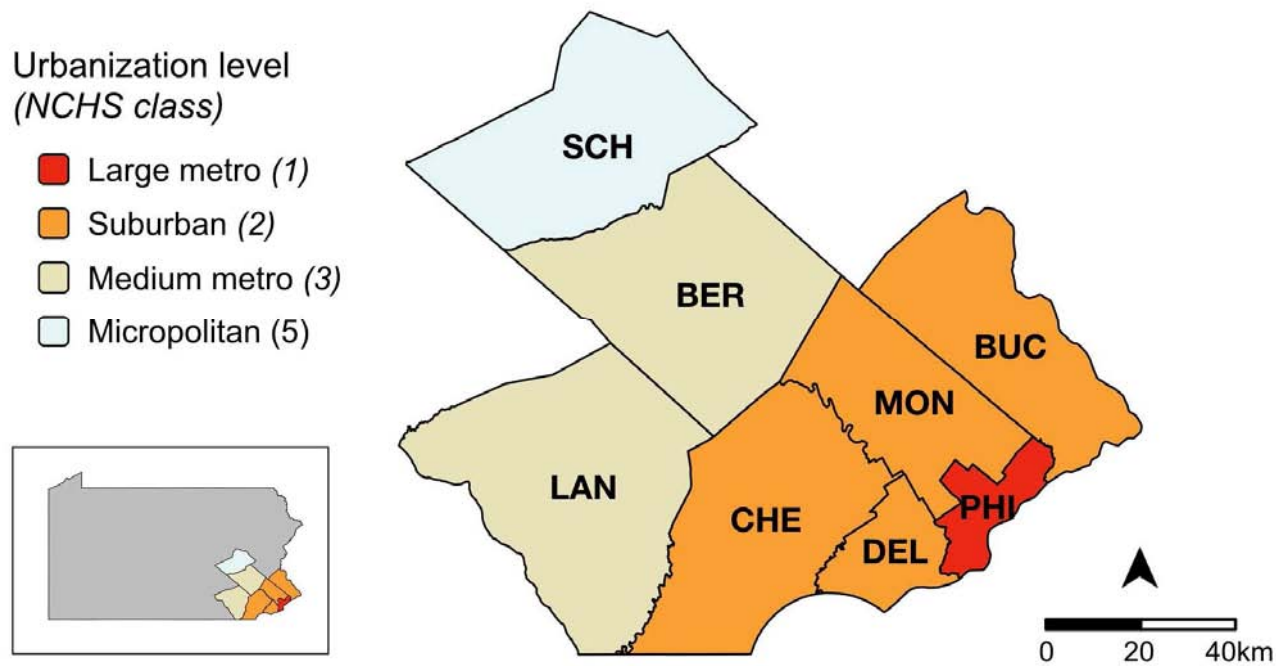

**Supplemental Fig. 1.** Counties surveyed by SEPA-HHS and BLS-HHS shaded by urban/rural classification. Counties are abbreviated as follows: PHI = Philadelphia, BUC = Bucks, CHE = Chester, DEL = Delaware, MON = Montgomery, BER = Berks, LAN = Lancaster, and SCH = Schuylkill. The inset map in the bottom left-hand corner shows the state of Pennsylvania with the study area shaded in color.

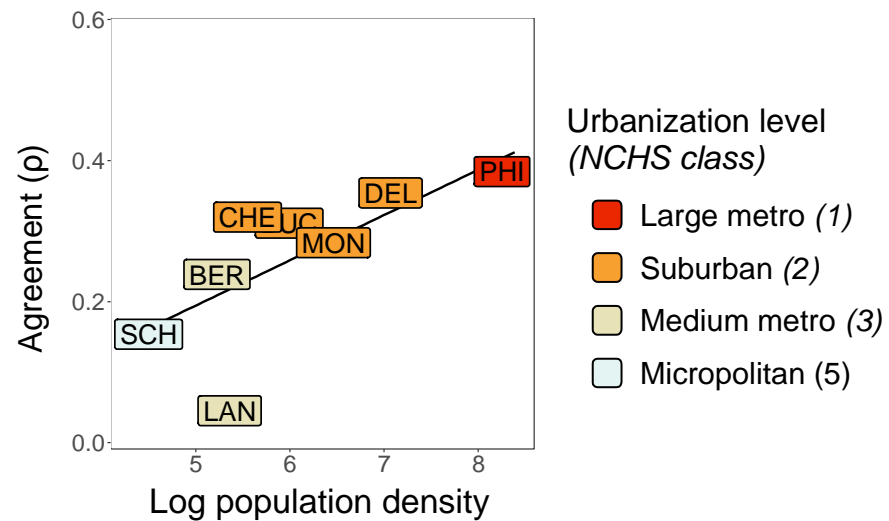

**Supplemental Fig. 2.** County-level agreement (Spearman's  $\rho$ ) between educational attainment and tract-level neighborhood advantage. PHI = Philadelphia, BUC = Bucks, CHE = Chester, DEL = Delaware, MON = Montgomery, BER = Berks, LAN = Lancaster, and SCH = Schuylkill.

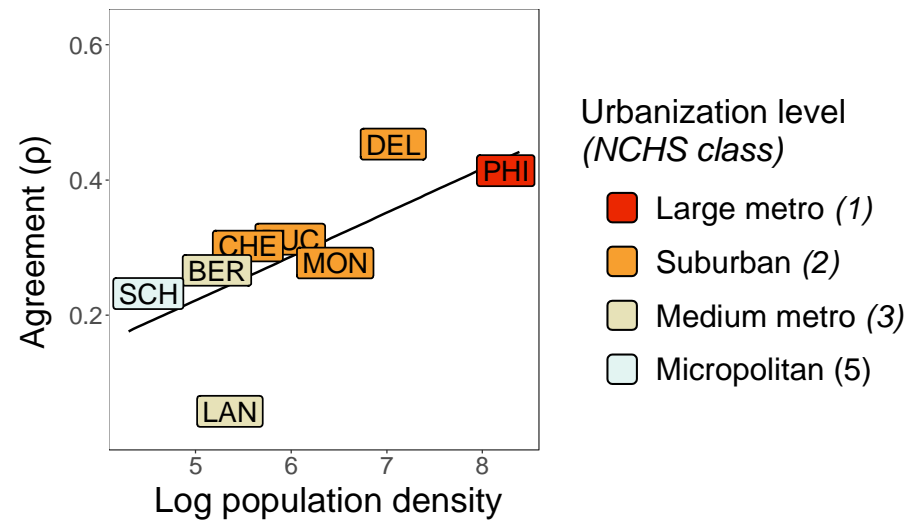

**Supplemental Fig. 3.** County-level agreement (Spearman's  $\rho$ ) between relative income and ZCTA-level neighborhood advantage. PHI = Philadelphia, BUC = Bucks, CHE = Chester, DEL = Delaware, MON = Montgomery, BER = Berks, LAN = Lancaster, and SCH = Schuylkill.
